# Supplementary material for: Examine Website Defacement Dataset by Exploiting Some Classifiers’ Capabilities
Source: Preprints.org preprint supplement (doi:10.20944/preprints202310.1743.v1), 2023-10-27
Supplement: Supplementary file 1 [file supplementary]

Elrasheed Ismail Mohommoud ZAYID a,* [eazayid@ub.edu.sa](mailto:eazayid@ub.edu.sa)

Ibrahim Isahb, [iisah@aust.edu.ng](mailto:iisah@aust.edu.ng)

Yagoub Abbker Adamc, [yagoub@jazanu.edu.sa](mailto:yagoub@jazanu.edu.sa)

Nadir Abdelrahman Ahmed Faraha, [nfarah@ub.edu.sa](mailto:nfarah@ub.edu.sa)

Omar Abdullah Omar Alshehria, [ohazzah@ub.edu.sa](mailto:ohazzah@ub.edu.sa)

a University of Bisha, Department of Information Systems, College of Science & Arts-Alnamas, Alnamas 61977, Saudi Arabia

bCollege of Science and Technology, Department of Science and Laboratory Technology, Jigawa State Polytechnic Dutse, Jigawa, Nigeria

cJazan University, Department of Computer Science, College of Computer Science and Information Technology, Jazan, Saudi Arabia

_____________________

***Corresponding author.**

E-mail address: [eazayid@ub.edu.sa](mailto:eazayid@ub.edu.sa) (Elrasheed Ismail Mohommoud ZAYID)

ORCID: <https://orcid.org/0000-0003-2375-6911>

**Declarations**

- **Competing interests**

The authors declare that they have no competing interests.

- **Authors’ Contributions**: All authors contributed to the design and implementation of the research, to the analysis of the results and to the writing of the manuscript.
- **Availability of data**: The benchmark datasets generated and used in this research are available on request.
- **Availability of the code**: The programming code used in this research is available on request.
- **Informed Consent**: Not applicable
